# Supplementary material for: Profiling of the Predicted Circular RNAs in Ductal In Situ and Invasive Breast Cancer: A Pilot Study
Source: Int J Genomics. 2016 Nov 14;2016:4503840. doi: 10.1155/2016/4503840 (PMC5124670; doi:10.1155/2016/4503840)
Supplement: Supplementary file 1 — The Supplementary File was composed by three Supplementary Tables and the legends of the Supplementary Figures. Supplementary Table 1 showed the numbers of circRNAs predicted. Supplementary Table 2 listed Spearman correlation rho values for each of the EMT genes studied in the cohort. Supplementary Table 3 listed the diseases enriched for the candidate circRNA using the circ2traits database. Supplementary Figure 1 showed the plot of the density presence of predicted circRNAs. Supplementary Figure 2 showed the heatmap of log values of 18 expressed circRNAs. Supplementary Figure 3 showed the alignment of each miRNAs against the candidate circRNA. [file 4503840.f1.pdf]

## Supplementary Files

**Supplementary Table 1.** The numbers of circRNAs predicted before and after the filtering criteria described in Material and Methods. The final percentage of predicted circRNAs that pass the filtering procedure is reported.

|                                                     | DCIS1        | DCIS2        | DCIS3        | DCIS4        | DCIS6        | IDC1         | IDC2         | IDC3         | IDC4         | IDC6         |
|-----------------------------------------------------|--------------|--------------|--------------|--------------|--------------|--------------|--------------|--------------|--------------|--------------|
| <b>Number of circRNAs pre filtering procedure</b>   | <b>243</b>   | <b>188</b>   | <b>68</b>    | <b>88</b>    | <b>916</b>   | <b>84</b>    | <b>85</b>    | <b>94</b>    | <b>57</b>    | <b>115</b>   |
| <b>Number of circRNAs after filtering procedure</b> | <b>81</b>    | <b>61</b>    | <b>41</b>    | <b>25</b>    | <b>360</b>   | <b>57</b>    | <b>17</b>    | <b>27</b>    | <b>37</b>    | <b>70</b>    |
| <b>Percentage</b>                                   | <b>33.33</b> | <b>32.45</b> | <b>60.29</b> | <b>28.41</b> | <b>39.30</b> | <b>67.86</b> | <b>20.00</b> | <b>28.72</b> | <b>64.91</b> | <b>60.87</b> |

**Supplementary Table 2.** Spearman correlation rho values were listed for each of the EMT genes studied in the cohort. VIM and CDH1 were not targeted by miRNAs investigated, but were included because are important EMT markers.

| Genes       | miRTarBase                   | Spearman rho      | 2 tails p-values |
|-------------|------------------------------|-------------------|------------------|
| <b>ZEB1</b> | miR-200c - miR200b - miR-429 | -0.3142857        | 0.5441           |
| <b>ZEB2</b> | miR-200c - miR200b - miR-429 | -0.08571429       | 0.8717           |
| <b>BMI</b>  | miR-200c - miR200b           | <b>0.8857143</b>  | <b>0.01885</b>   |
| <b>FN1</b>  | miR-200c - miR200b           | <b>-0.8857143</b> | <b>0.01885</b>   |
| <b>VIM</b>  | -                            | -0.4285714        | 0.3965           |
| <b>CDH1</b> | -                            | 0.7714286         | 0.0724           |

**Supplementary Table 3.** The table listed the diseases enriched for the hsa-circ-001803 using the circ2traits database.

| ID circRNA             | Disease                               | <i>p-values</i>    |
|------------------------|---------------------------------------|--------------------|
| hsa_circ_001803        | lung cancer                           | 1.16E-10           |
| hsa_circ_001803        | non-small cell lung cancer            | 3.01E-06           |
| <b>hsa_circ_001803</b> | <b>breast cancer</b>                  | <b>0.001762331</b> |
| hsa_circ_001803        | head and neck squamous cell carcinoma | 0.001762331        |
| hsa_circ_001803        | ovarian cancer                        | 0.001762331        |
| hsa_circ_001803        | adenoma                               | 0.029454035        |
| hsa_circ_001803        | bladder cancer                        | 0.029454035        |
| hsa_circ_001803        | Burkitt lymphoma                      | 0.029454035        |
| hsa_circ_001803        | cholangiocarcinoma                    | 0.029454035        |
| hsa_circ_001803        | colorectal cancer                     | 0.029454035        |
| hsa_circ_001803        | coronary artery disease               | 0.029454035        |
| hsa_circ_001803        | gastric cancer                        | 0.029454035        |
| hsa_circ_001803        | glioma                                | 0.029454035        |
| hsa_circ_001803        | hamartoma                             | 0.029454035        |
| hsa_circ_001803        | laryngeal carcinoma                   | 0.029454035        |
| hsa_circ_001803        | lipoma                                | 0.029454035        |
| hsa_circ_001803        | malignant melanoma                    | 0.029454035        |
| hsa_circ_001803        | myoma                                 | 0.029454035        |
| hsa_circ_001803        | prostate cancer                       | 0.029454035        |
| hsa_circ_001803        | sarcoma                               | 0.029454035        |
| hsa_circ_001803        | squamous carcinoma                    | 0.029454035        |
| hsa_circ_001803        | tongue squamous cell carcinoma        | 0.029454035        |
| hsa_circ_001803        | uterine leiomyoma                     | 0.029454035        |

## Supplementary Figures

**Supplementary Figure 1.** The plot showed the density presence of predicted circRNAs (*y* axes) related to their length (*x* axes) comparing the DCIS (rose) and IDC (blue) samples.

**Supplementary Figure 2.** The heatmap showed the log expression values of 18 predicted circRNAs (*y* axis) . The name of each circRNAs was reported including the name of the genes the circRNAs derived from. All the samples were listed (*x*-axis). Log2 SRBM values were reported. Black label showed no detectable levels.

**Supplementary Figure 3.** The alignment scores of each miRNAs against hsa-circ-0001358 were reported. The alignments were obtained using the Starbase human Pan cancer tool.

**Supplementary Figure 1.**

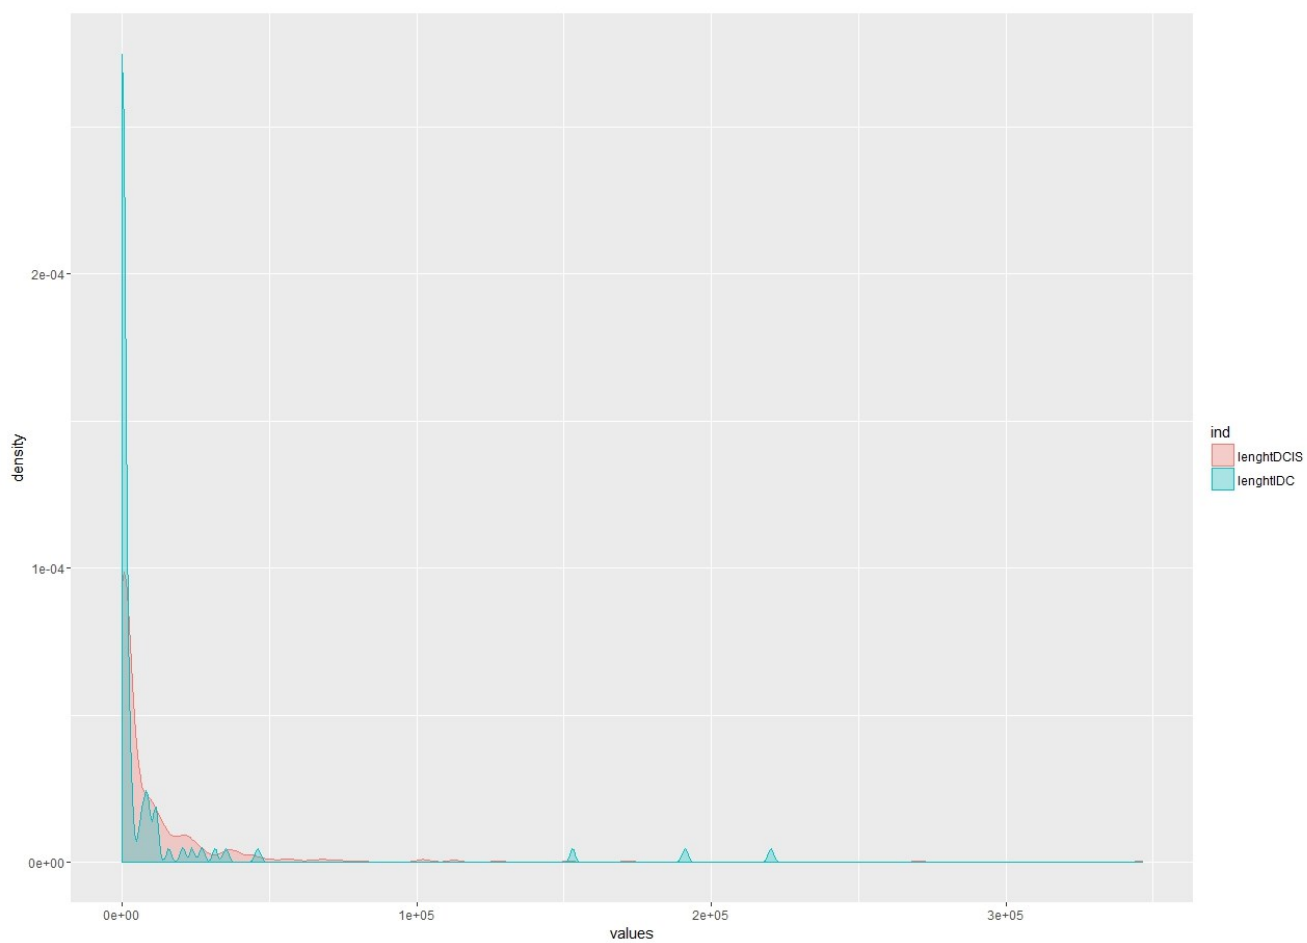

Supplementary Figure 2.

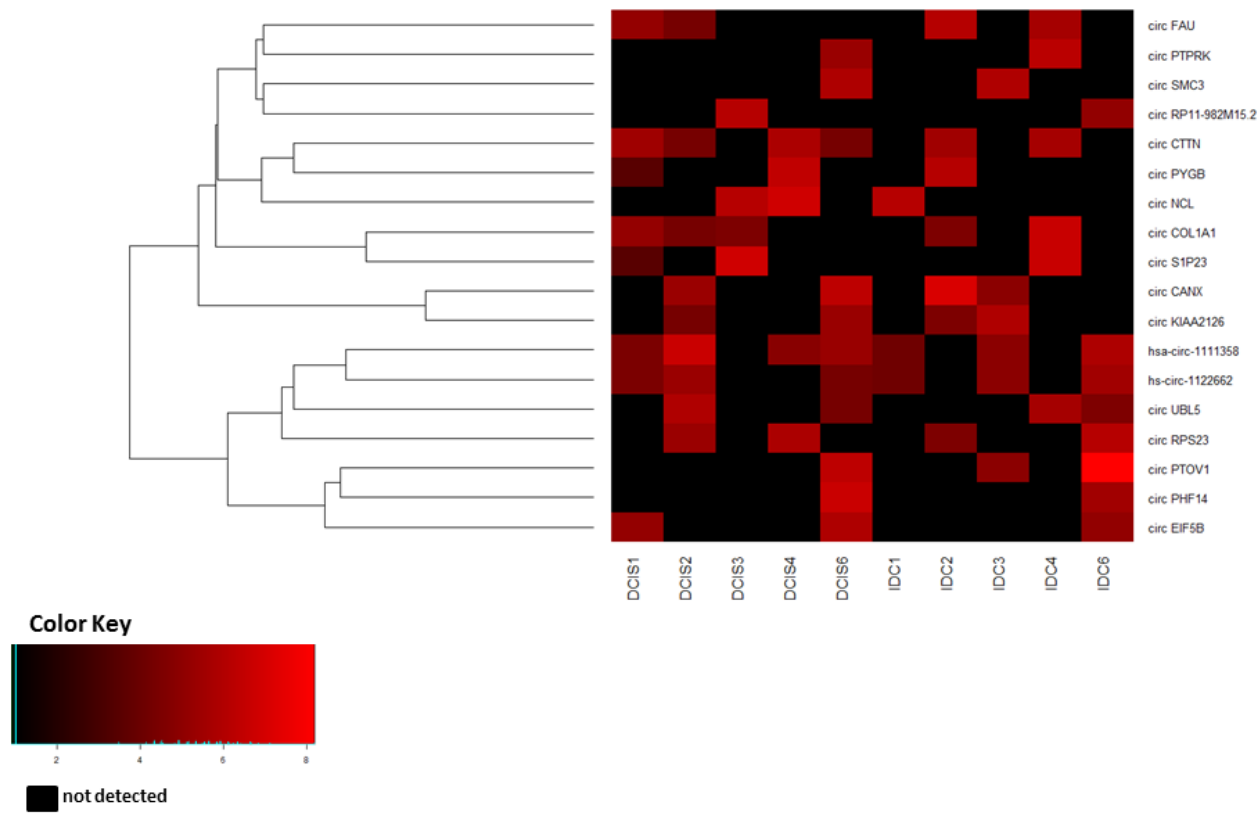

### Supplementary Figure 3.

miR-200c-3p miRNA 3'-aggtagtAATGGGCCGTCATAAt-5'  
|| : | |||||  
ncRNA 5'-aggctgtTTTGTAGCCAGTATTc-3'  
*alignScore = 144*

miR-429-3p miRNA 3'-tgcCAAAATGGTCTGTCATAAt-5'  
|||||: :|| |||||  
ncRNA 5'-gctGTTTTG-TAGCCAGTATTc-3'  
*alignScore = 165*

miR-200b-3p miRNA 3'-agtagtAATGGTCCGTCATAAt-5'  
|| :|| |||||  
ncRNA 5'-ggctgtTTTGTAGCCAGTATTc-3'  
*alignScore = 155*

miR-376a-3p miRNA 3'-tgCACCTAAAAG--GAGATACTa-5'  
||| || | : |||||  
ncRNA 5'-agGTGTATGTATGGATCTATGAc-3'  
*alignScore = 146*

miR-376b-3p miRNA 3'-ttgTACCTAAAAG--GAGATACTa-5'  
:|| || | : |||||  
ncRNA 5'-gagGTGTATGTATGGATCTATGAc-3'  
*alignScore = 142*
